# Supplementary material for: Therapeutic Decision Making in Prevascular Mediastinal Tumors Using CT Radiomics and Clinical Features: Upfront Surgery or Pretreatment Needle Biopsy?
Source: MDPI journal article supplement (doi:10.3390/cancers16040773), 2024-02-13
Supplement: s1 [file s1]

**Supplementary Table S1.** The centrality and dispersion for age, LDH, AFP and HCG.

|             |                | Age    | LDH     | AFP         | HCG          |
|-------------|----------------|--------|---------|-------------|--------------|
| Category 1. | N              | 182    | 31      | 45          | 31           |
|             | Mean           | 60.02  | 210.10  | 2.46833     | .40555       |
|             | Std. Deviation | 15.629 | 91.214  | 1.299046    | .905478      |
|             | Grouped Median | 60.87  | 189.00  | 2.29000     | .17167       |
|             | Kurtosis       | .292   | 4.856   | 1.140       | 6.957        |
|             | Skewness       | -.463  | 1.920   | .766        | 2.679        |
|             | Range          | 87     | 423     | 6.470       | 3.700        |
| Category 2. | N              | 193    | 116     | 82          | 68           |
|             | Mean           | 52.70  | 392.15  | 1128.34102  | 2994.00781   |
|             | Std. Deviation | 20.945 | 376.722 | 6176.807435 | 21326.820646 |
|             | Grouped Median | 54.50  | 250.50  | 2.10500     | .12727       |
|             | Kurtosis       | -1.054 | 6.735   | 53.231      | 65.321       |
|             | Skewness       | .017   | 2.537   | 7.009       | 8.025        |
|             | Range          | 83     | 1979    | 50610.000   | 174608.000   |
| Total       | N              | 375    | 147     | 127         | 99           |
|             | Mean           | 56.25  | 353.76  | 729.40976   | 2056.61720   |
|             | Std. Deviation | 18.890 | 345.034 | 4981.887025 | 17689.109293 |
|             | Grouped Median | 59.14  | 238.00  | 2.21667     | .14103       |
|             | Kurtosis       | -.649  | 9.078   | 83.142      | 95.156       |
|             | Skewness       | -.273  | 2.884   | 8.752       | 9.685        |
|             | Range          | 92     | 1979    | 50610.000   | 174608.000   |

**Supplementary Table S2.** List of clinical and radiomic features extracted by the third LASSO logistic regression analysis (Selection\_3).

---

**Clinical feature**

LDH

**Radiomic features**

original\_shape\_Flatness  
original\_shape\_Maximum2DDiameterSlice  
original\_shape\_Sphericity  
original\_firstorder\_10Percentile original\_firstorder\_Mean  
original\_gldm\_DependenceNonUniformityNormalized  
wavelet.LLH\_firstorder\_Energy  
wavelet.LLH\_firstorder\_TotalEnergy  
wavelet.LLH\_glcm\_ClusterProminence  
wavelet.LLH\_glcm\_Idmn  
wavelet.LLH\_glszm\_LowGrayLevelZoneEmphasis  
wavelet.LLH\_glszm\_SmallAreaLowGrayLevelEmphasis  
wavelet.LHH\_glcm\_MCC  
wavelet.LHH\_glszm\_LowGrayLevelZoneEmphasis  
wavelet.LHH\_glszm\_SizeZoneNonUniformityNormalized  
wavelet.LHH\_glszm\_ZoneEntropy  
wavelet.HLL\_glcm\_ClusterProminence  
wavelet.HHL\_glcm\_Correlation  
wavelet.HHL\_glcm\_InverseVariance  
wavelet.HHL\_glszm\_LowGrayLevelZoneEmphasis  
wavelet.LLL\_glcm\_InverseVariance  
wavelet.LLL\_glszm\_SmallAreaEmphasis

---

Abbreviations: LDH: lactate dehydrogenase
